# Supplementary material for: Super-Resolution Imaging of Fas/CD95 Reorganization Induced by Membrane-Bound Fas Ligand Reveals Nanoscale Clustering Upstream of FADD Recruitment
Source: MDPI journal article supplement (doi:10.3390/cells11121908), 2022-06-12
Supplement: s1 [file s1]

Article

# Super-resolution imaging of Fas/CD95 reorganization induced by membrane-bound Fas ligand reveals nanoscale clustering upstream of FADD recruitment

Nicholas Frazzette<sup>\*1</sup>, Anthony C. Cruz<sup>\*1</sup>, Xufeng Wu<sup>2</sup>, John A. Hammer<sup>2</sup> Jennifer Lippincott-Schwartz<sup>3</sup>, Richard M. Siegel<sup>\*1,4</sup> and Prabuddha Sengupta<sup>\*3</sup>

Supplemental Data

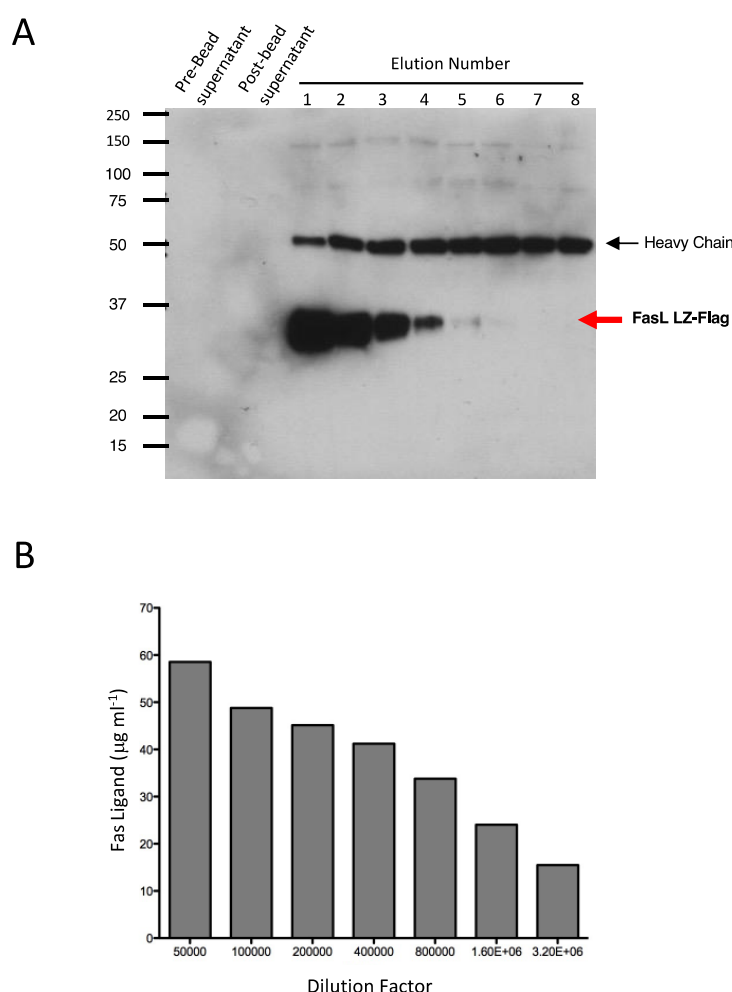

**Supplemental Figure S1.** Production and purification of recombinant FasL-LZ. **(A)** Western blot analysis of HEK293T cell supernatants 7d post-transfection with an expression construct for FasL-LZ tagged with a FLAG-tag. FasL-LZ was purified using anti-FLAG beads and eluted using 0.1M glycine-HCl, pH2.5. **(B)** FasL-LZ was pooled from positive elution fractions, dialyzed in PBS to remove the glycine and assayed for FasL protein levels by ELISA. An example dilution series is shown.

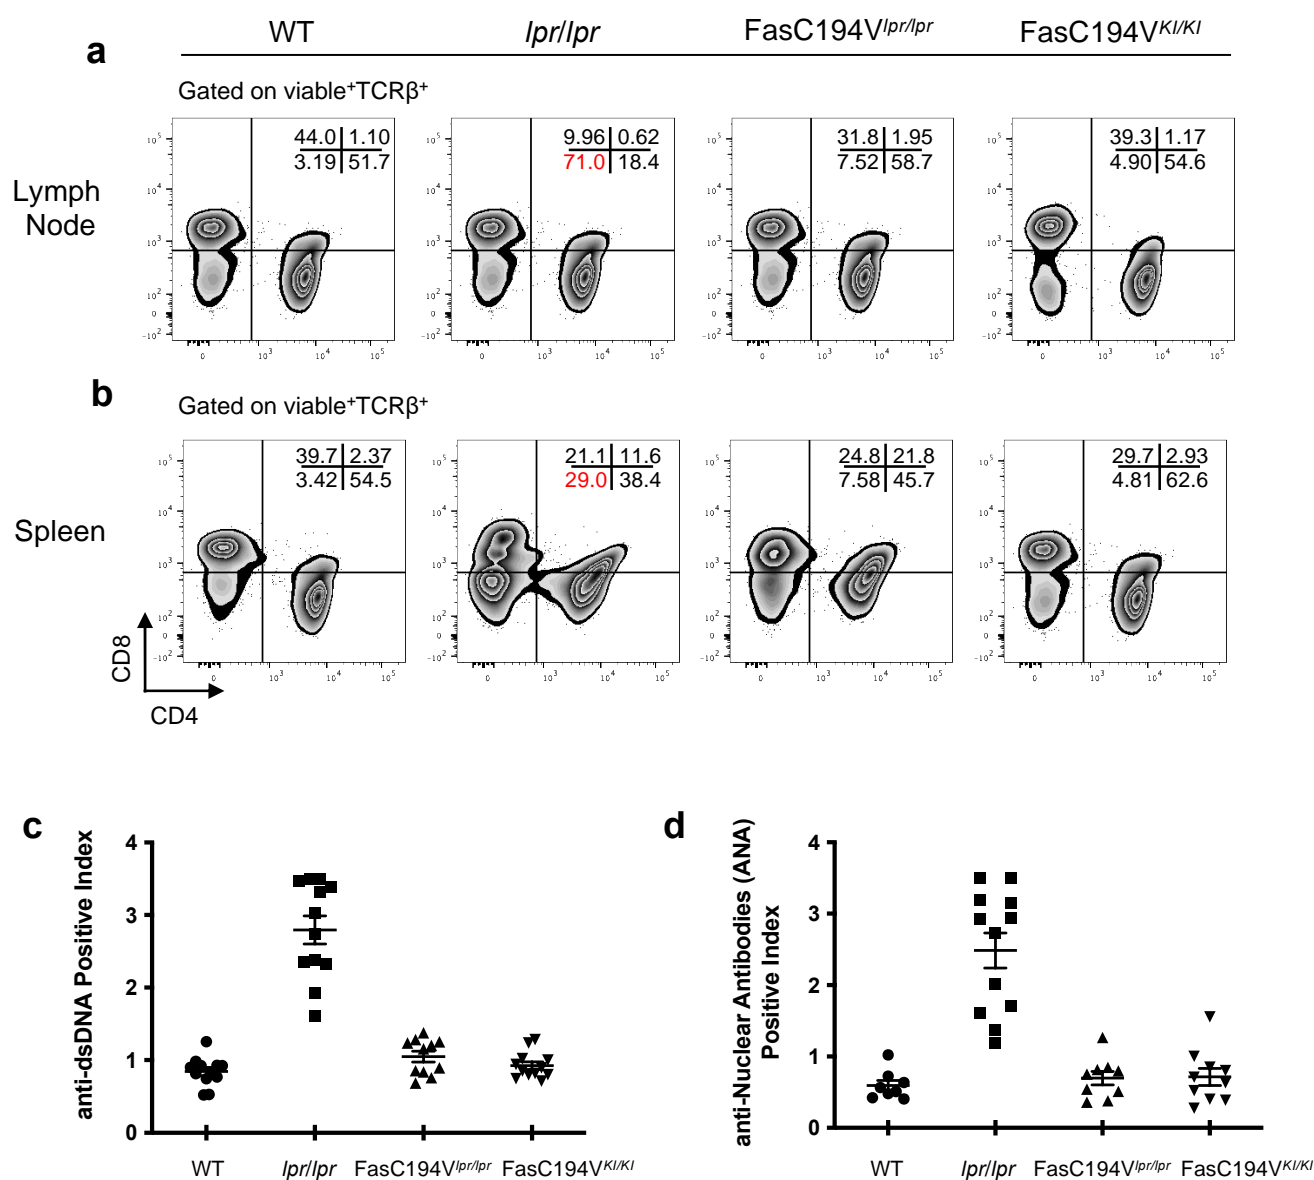

**Supplemental Figure S2.** Characterization of Fas C194V knock-in mice (**A**, **B**) Lymph nodes (**A**) or Spleen (**B**) of age-matched WT, *lpr/lpr*, FasC194V*lpr/lpr*, or FasC194V<sup>KI/KI</sup> mice were isolated, stained for the indicated markers and analyzed by flow cytometry. Cells were gated on the viable, TCRβ<sup>+</sup> single cell population and representative of three independent experiments (N=3). (**C**, **D**) Serum was collected from mice of the indicated genotypes (≥ 6 months of age, N ≥ 10 mice for each genotype) and analyzed via ELISA for antibodies to double-stranded DNA (dsDNA; **C**) or antibodies to nuclear proteins (ANA; **D**). Experiment is cumulative of three independent experiments (N=3).
