# Supplementary material
Source: MDPI journal article supplement (https://www.mdpi.com/2073-4409/11/12/1908)
Supplement: s1 [file s1]

Archive with 1 entries (1 files):
- cells-1690927-supplementary.pdf
